# Supplementary material
Source: PubMed Central journal article supplement (PMC2738701)
Supplement: emboj2009205s4.pdf [file emboj2009205s4.pdf]

| <b>Point mutations<br/>made in Activin A<br/>prehelix-switch</b> |
|------------------------------------------------------------------|
| E48A                                                             |
| F49A                                                             |
| V50A                                                             |
| F51A                                                             |
| L52A                                                             |
| Q53A                                                             |
| K54A                                                             |
| Y55A                                                             |
| P56A                                                             |

**Supplementary Figure 4: Point mutations made in the prehelix region of activin A prehelix-switch.** Single point mutations to alanine made in the prehelix region of activin A prehelix-switch do not decrease signaling of this ligand through Alk5. Residue numbers correspond to those in myostatin.
